# Supplementary material for: Buckled-layer K1.39Mn3O6: a novel cathode for potassium-ion batteries
Source: Royal Society of Chemistry journal article supplement (doi:10.1039/d4sc06727d), 2024-11-25
Supplement: d4sc06727d1.pdf [file d4sc06727d1.pdf]

## Supporting information

### **Buckled-layer $K_{1.39}Mn_3O_6$ : a novel cathode for potassium-ion batteries**

Ang Li,<sup>a,b</sup> ZiqiWang,<sup>c</sup> Yunhua Xu\*<sup>a</sup>

<sup>a</sup> School of Materials Science and Engineering, Key Laboratory of Advanced Ceramics and Machining Technology (Ministry of Education), Tianjin Key Laboratory of Composite and Functional Materials, Tianjin University, Tianjin 300072, China. E-mail: yunhua.xu@tju.edu.cn.

<sup>b</sup> School of Sciences, Civil Aviation University of China, Tianjin 300300, P.R. China  
Jinbei Road 2898, Dongli District, Tianjin, P.R. China. E-mail: a\_li@cauc.edu.cn.

<sup>c</sup> Aeronautical Engineering Institute, Civil Aviation University of China, Tianjin 300300, P.R. China  
Jinbei Road 2898, Dongli District, Tianjin, P.R. China

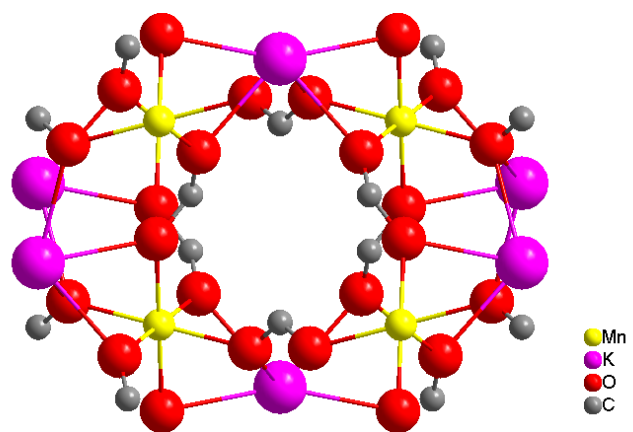

**Fig. S1** Structural characterization of KM-MOF.

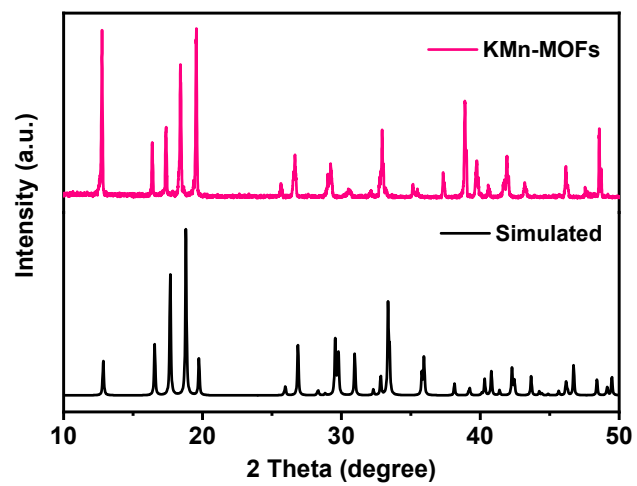

**Fig. S2** XRD patterns at different temperatures of KM-MOF.

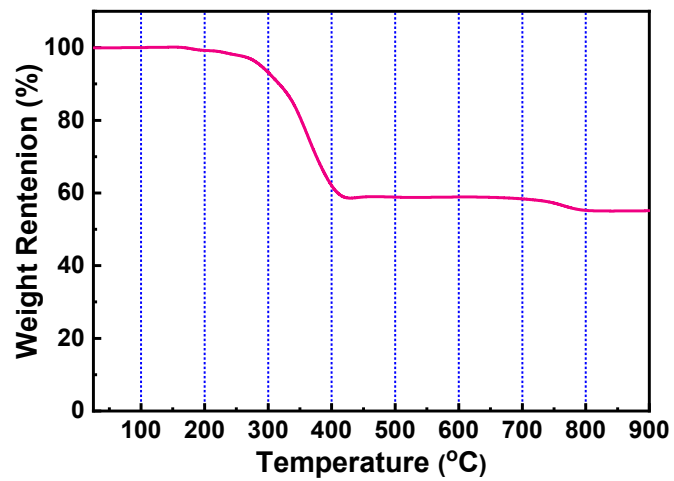

Fig. S3 TGA curve of KMn-MOF.

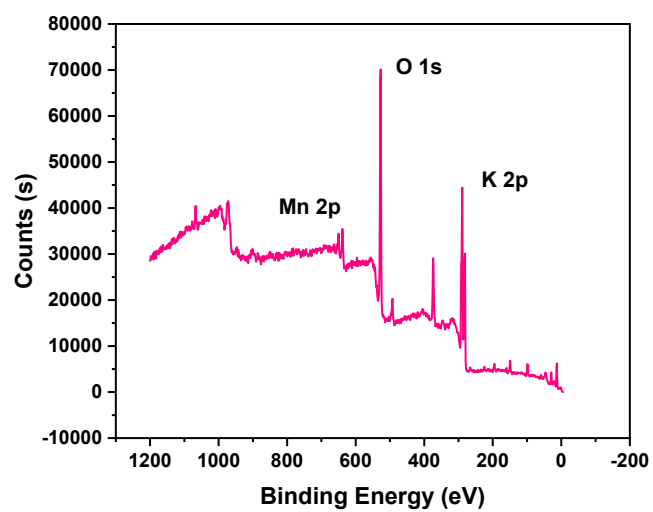

**Fig. S4** XPS survey scans of BL-KMO.

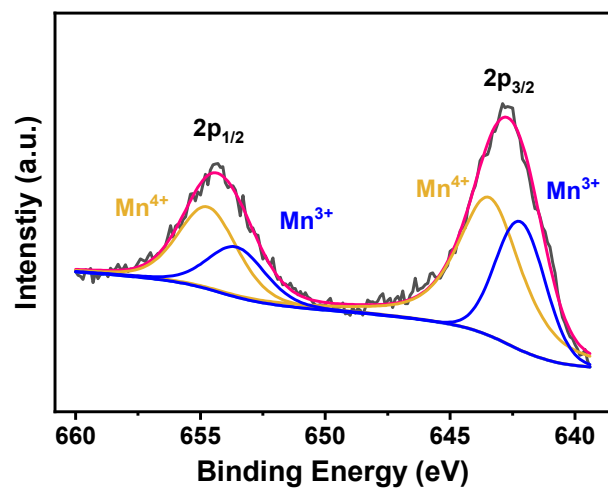

Fig. S5 High-resolution Mn2p XPS spectrum of BL-KMO.

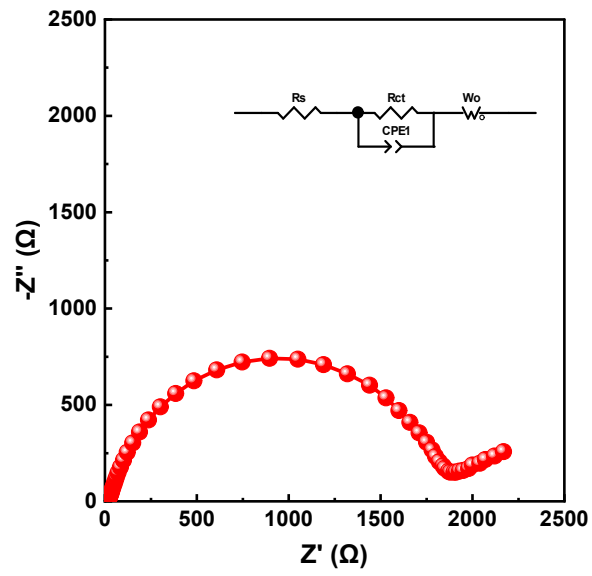

Fig. S6 Nyquist plot of BL-KMO at open-circuit voltage.

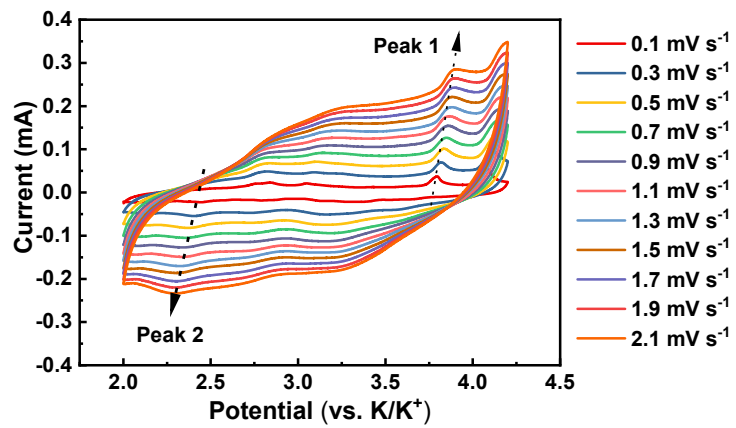

Fig. S7 CV curves of the BL-KMO cathode at different scan rates.



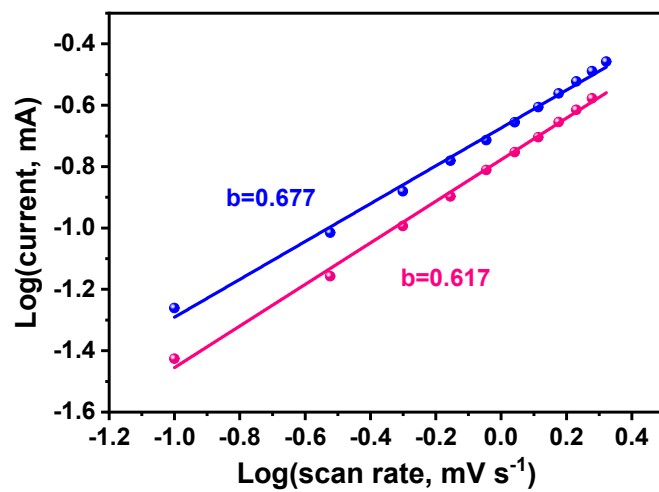

**Fig. S8** Linear correlation between  $\log i$  and  $\log v$  of BL-KMO.

| Layered oxide                                                                                                   | Discharge capacity<br>(mAh g <sup>-1</sup> @ mA g <sup>-1</sup> ) | Cycle performance<br>(capacity retention@cycles) | Rate performance<br>(mAh g <sup>-1</sup> @ mA g <sup>-1</sup> ) | References       |
|-----------------------------------------------------------------------------------------------------------------|-------------------------------------------------------------------|--------------------------------------------------|-----------------------------------------------------------------|------------------|
| <b>BL-KMO</b>                                                                                                   | <b>105@100<br/>70@200</b>                                         | <b>91.3%@100<br/>99.2%@100</b>                   | <b>70@1000</b>                                                  | <b>This work</b> |
| K <sub>0.5</sub> Mn <sub>0.8</sub> Cu <sub>0.1</sub> Mg <sub>0.1</sub> O <sub>2</sub>                           | 100.1 @50                                                         | 75.41%@100                                       | 91.2@500                                                        | 1                |
| P3-K <sub>0.5</sub> Mn <sub>0.67</sub> Fe <sub>0.33</sub> O <sub>1.95</sub> N <sub>0.05</sub>                   | 100@100                                                           | 74.4%@100                                        | about 50@500                                                    | 2                |
| P3-K <sub>0.5</sub> Mn <sub>0.7</sub> Ni <sub>0.3</sub> O <sub>2</sub>                                          | about 80@100                                                      | 77%@300                                          | 57.1@500                                                        | 3                |
| P3- K <sub>0.5</sub> Mn <sub>0.85</sub> Co <sub>0.05</sub> Fe <sub>0.05</sub> Al <sub>0.05</sub> O <sub>2</sub> | 90@50                                                             | /                                                | 61.9@500                                                        | 4                |
| KMOLi10                                                                                                         | 90.71 @100                                                        | 84.04%@100                                       | 53.7@5C                                                         | 5                |
| P3-K <sub>0.5</sub> Mn <sub>0.8</sub> Co <sub>0.2</sub> B <sub>0.1</sub> O <sub>2</sub>                         | 86.1@200                                                          | 87.1%@100                                        | 58.3@5C                                                         | 6                |
| P3-K <sub>0.45</sub> Rb <sub>0.05</sub> Mn <sub>0.85</sub> Mg <sub>0.15</sub> O <sub>2</sub>                    | 95.1@50                                                           | 81%@100                                          | about 50@500                                                    | 7                |
| P3- K <sub>0.48</sub> Mn <sub>0.4</sub> Co <sub>0.6</sub> O <sub>2</sub>                                        | 64@C/20                                                           | 82%@30                                           | 24@1C                                                           | 8                |
| P2-K <sub>0.44</sub> Ni <sub>0.22</sub> Mn <sub>0.78</sub> O <sub>2</sub>                                       | 82@100                                                            | 67%@500                                          | 58@500                                                          | 9                |
| P2-K <sub>0.75</sub> Mn <sub>0.8</sub> Ni <sub>0.1</sub> Fe <sub>0.1</sub> O <sub>2</sub>                       | 80@100                                                            | 70%@200                                          | 62@1000                                                         | 10               |

**Tab. S1** Electrochemical performance comparison of LTMOS in KIBs in this work and the literature.

1. H. Chen, X.-W. Gao, Q. Li, R.-Z. Niu, S.-S. Wang, Q.-F. Gu, J.-J. Mu and W.-B. Luo, *J. Mater. Chem. A*, 2024, **12**, 6261-6268.
2. L. Duan, H. Tang, X. Xu, J. Liao, X. Li, G. Zhou and X. Zhou, *Energy Storage Mater.*, 2023, **62**, 408–414
3. L. Duan, J. Xu, Y. Xu, R. Tian, Y. Sun, C. Zhu, X. Mo and X. Zhou, *J. Energy Chem.*, 2023, **76**, 332-338.
4. S.-S. Wang, Z.-M. Liu, X.-W. Gao, X.-C. Wang, H. Chen and W.-B. Luo, *ACS Appl. Mater. Interfaces*, 2023, **15**, 57165-57173.
5. Z. Zhao, Y. Sun, Y. Pan, J. Liu, J. Zhou, M. Ma, X. Wu, X. Shen, J. Zhou and P. Zhou, *J. Colloid. Interface Sci.*, 2023, **652**, 231-239.
6. X. Xu, X.-L. Li, M. M. Rahman, J. Bao, R.-J. Luo, C. Ma, C.-Y. Du, J. Zeng, Z. Mei, Z. Qian, E. Hu and Y.-N. Zhou, *Chem. Eng. J*, 2023, **477**, 147021.
7. Z. Caixiang, J. Hao, J. Zhou, X. Yu and B. Lu, *Adv. Energy Mater*, 2022, **13**, 202203126.
8. K. Sada and P. Barpanda, *Chem. Commun.*, 2020, **56**, 2272-2275.
9. X. Zhang, Y. Yang, X. Qu, Z. Wei, G. Sun, K. Zheng, H. Yu and F. Du, *Adv. Funct. Mater.*, **2019**, **29**, 1905679.
10. J.-Y. Hwang, J. Kim, T.-Y. Yu, H.-G. Jung, J. Kim, K.-H. Kim and Y.-K. Sun, *J. Mater. Chem. A*, **2019**, **7**, 21362-21370.
